# Supplementary material for: The long non-coding RNA SNHG4/microRNA-let-7e/KDM3A/p21 pathway is involved in the development of non-small cell lung cancer
Source: PubMed Central journal article supplement (PMC7995486; doi:10.1016/j.omto.2020.12.010), 2020-12-25
Supplement: mmc1.pdf [file mmc1.pdf]

OMTO, Volume 20

## **Supplemental information**

**The long non-coding RNA SNHG4/microRNA-let-7e/KDM3A/p21 pathway is involved in the development of non-small cell lung cancer**

**Fan Wang and Qingqing Quan**

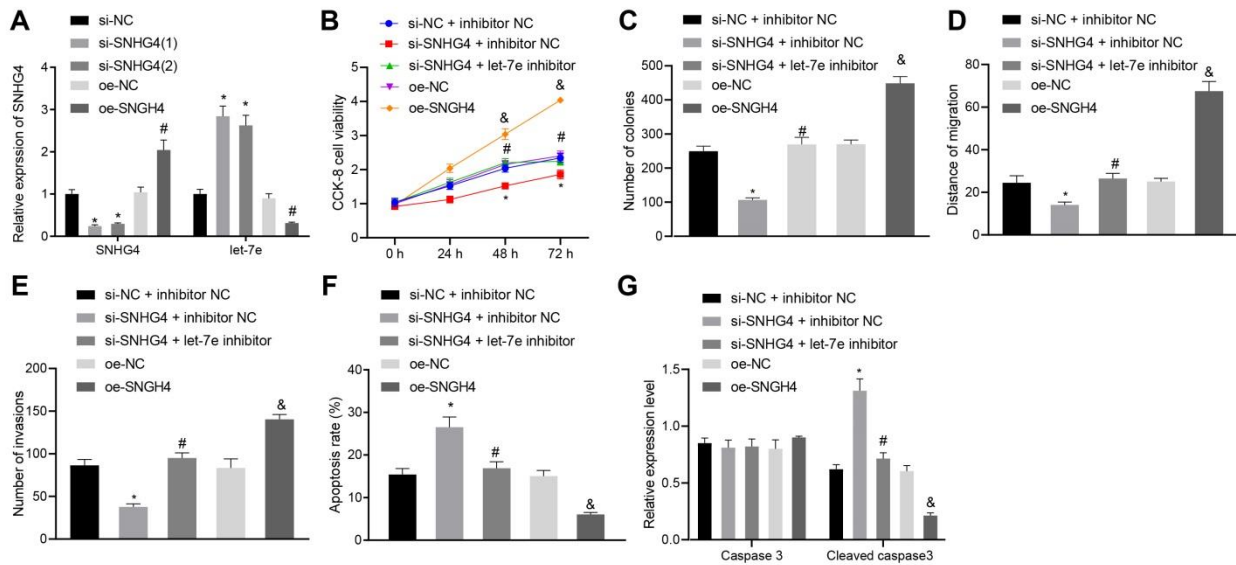

**Supplementary Figure 1. LncRNA SNHG4 mediates H1975 cell proliferation, migration, invasion, and apoptosis by binding to miR-let-7e.**

A, Expression of lncRNA SNHG4 and miR-let-7e after siRNA knockdown of lncRNA SNHG4 in H1975 cells. B, H1975 cell viability measured by CCK-8 assays. C, Numbers of colonies derived from H1975 cells. D, Scratch wound healing. E, H1975 cells invading from Matrigel-coated upper transwell chambers into lower ones. F, H1975 cell apoptosis determined by Annexin V/PI-labeled flow cytometric analysis. G, Western blot analysis of caspase 3 and cleaved caspase 3 in H1975 cells, normalized to  $\beta$ -actin expression. \* (compared with H1975 cells treated with scramble siRNA alone and/or inhibitor NC), # (compared with H1975 cells treated with oe-NC alone or lncRNA SNHG4-specific siRNA plus inhibitor NC) and & (compared with H1975 cells treated with oe-NC alone) indicate  $p < 0.05$  by Tukey's test-corrected one-way ANOVA or Bonferroni-corrected repeated measures ANOVA.

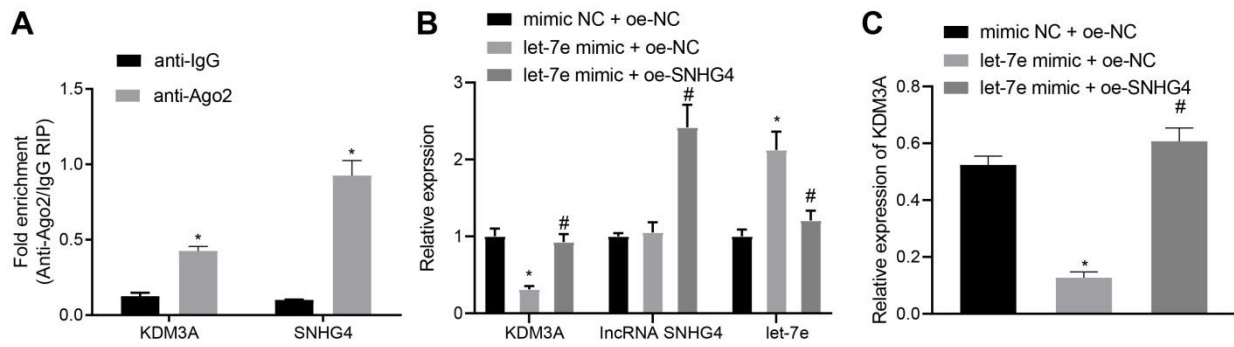

**Supplementary Figure 2. LncRNA SNHG4 bound to miR-let-7e and upregulated KDM3A.**

A, Anti-Ago2 RIP in H1975 cells transiently overexpressing lncRNA SNHG4. B, The expression of KDM3A was determined by RT-qPCR in H1975 cells. C, Western blot analysis of KDM3A in H1975 cells, normalized to  $\beta$ -actin expression. \* (compared with H1975 cells treated with oe-NC with or without mimic NC) and # (compared with H1975 cells treated with miR-let-7e mimic with oe-NC) indicate  $p < 0.05$  by unpaired  $t$  test or Tukey's test-corrected one-way ANOVA. Pearson Correlation Coefficient was applied to correlation analysis between KDM3A and lncRNA SNHG4.

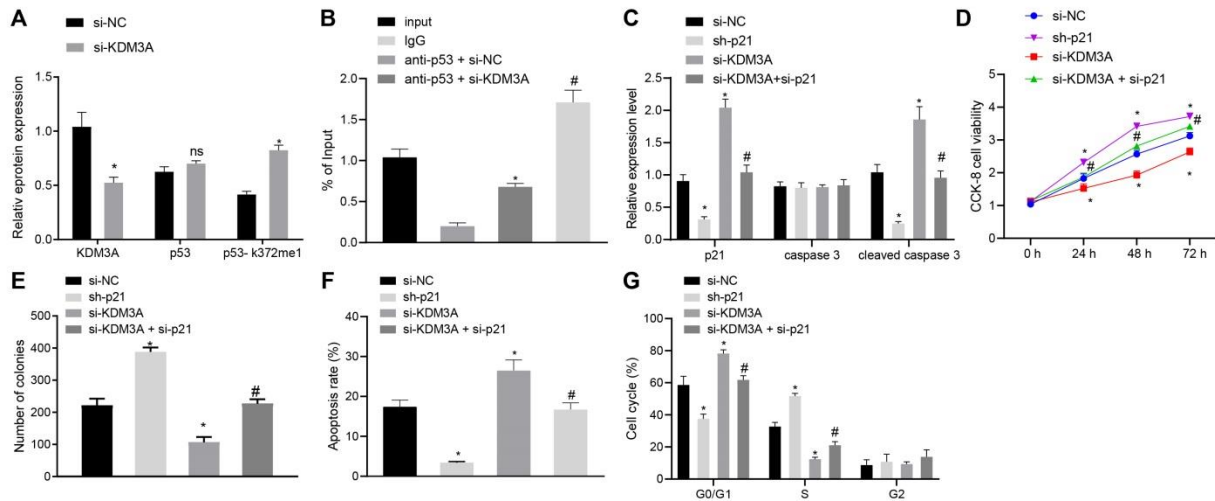

### Supplementary Figure 3. KDM3A functioned as an oncogene in NSCLC by inhibiting p21.

A, Western blots and quantification of KDM3A, p53-k372me1, and p53 in H1975 cells, normalized to  $\beta$ -actin expression. B, p21 was immunoprecipitated using p53 antibody relative to IgG by ChIP assays. C, Western blot analysis of p21, cleaved caspase 3, and caspase 3 in H1975 cells, normalized to  $\beta$ -actin expression. D, H1975 cell viability was measured by CCK-8 assays. E, Numbers of colonies derived from H1975 cells. F, H1975 cell apoptosis determined by Annexin V/PI-labeled flow cytometric analysis. G, H1975 cell cycle determined by flow cytometric analysis. \* (compared with scramble siRNA or IgG antibody) and # (compared with si-KDM3A or anti-p53 with si-NC) indicate  $p < 0.05$  by unpaired  $t$  test, Tukey's test-corrected one-way ANOVA or Bonferroni-corrected repeated measures ANOVA.
